# Supplementary material for: Weight Change in Breast Cancer Survivors Compared to Cancer-Free Women: A Prospective Study in Women at Familial Risk of Breast Cancer
Source: Oxford University Press journal article supplement (doi:10.1158/1055-9965.epi-15-0212), 2015-07-15
Supplement: 10559965epi150212-sup-145831_1_supp_2995936_n1z112.docx [file 10559965epi150212-sup-145831_1_supp_2995936_n1z112.docx]

| **Supplementary Table S1. Weight gain in survivors compared to cancer-free women, by BRCA1/2 carrier status.** | | | | | | |
| --- | --- | --- | --- | --- | --- | --- |
|  | **BRCA1/2 negative, variant of uncertain significance, or untested** | | | **BRCA1/2 positive** | | |
|  | n | **β** | **95% CI** | n | **Β** | **95% CI** |
| **Cancer-free** | 272 | 0 | referent | 35 | 0 | referent |
| **All survivors** | 252 | 2.1 | -0.08-4.28 | 51 | **8.36** | **1.14-15.58** |
| adjusted for age, baseline BMI, menopausal status, enrollment year, physical activity, and statin use | | | | | | |

This table reports on the comparison of weight gain in BC survivors to cancer free women among both BRCA 1/2 negative and BRCA1/2 positive women after adjusting for age, baseline BMI, menopausal status, enrollment year, physical activity and statin use.
